# Supplementary material
Source: Springer Nature journal article supplement (https://www.springermedizin.de/resource/supplementary/12937_2010_303_MOESM1_ESM.pdf/25654824)

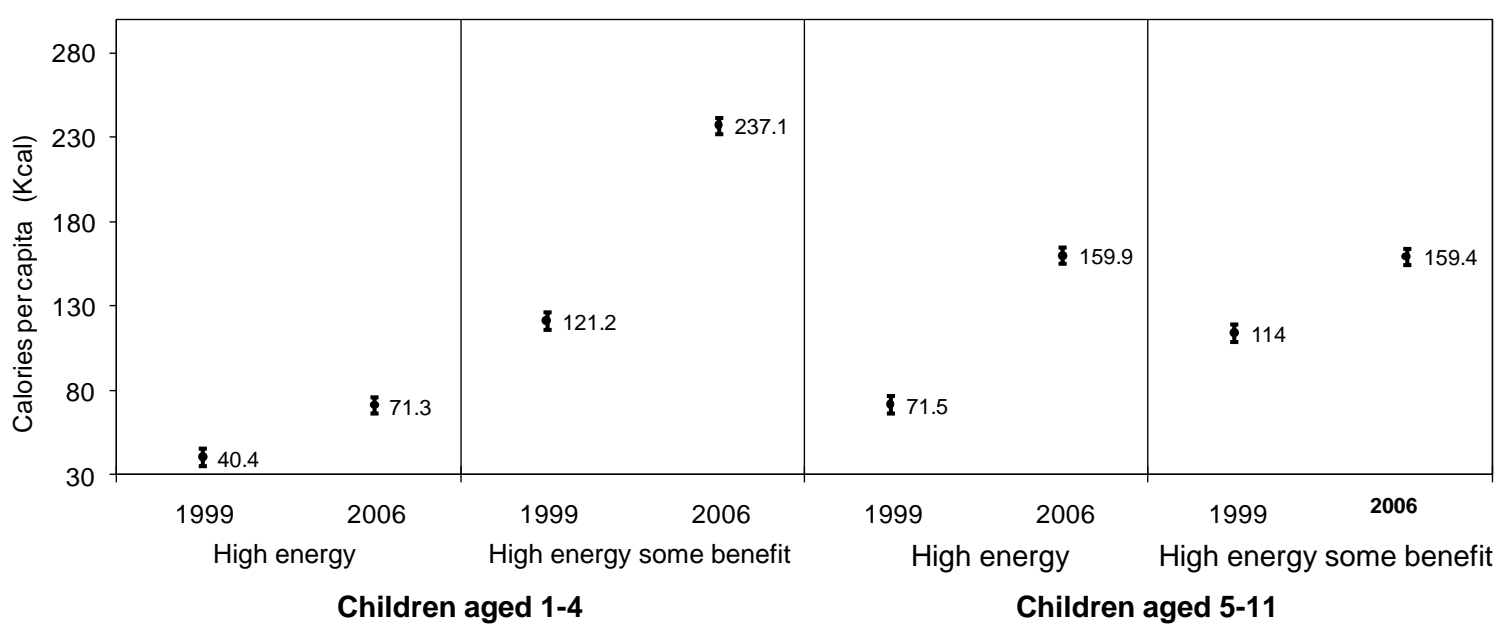

Supplement: MOESM1 [file 25654824]
